# Supplementary material
Source: PubMed Central journal article supplement (PMC4705948)
Supplement: 10.1074_M115.670794_jbc.M115.670794-1.pdf [file 10.1074_M115.670794_jbc.M115.670794-1.pdf]

Figure S1

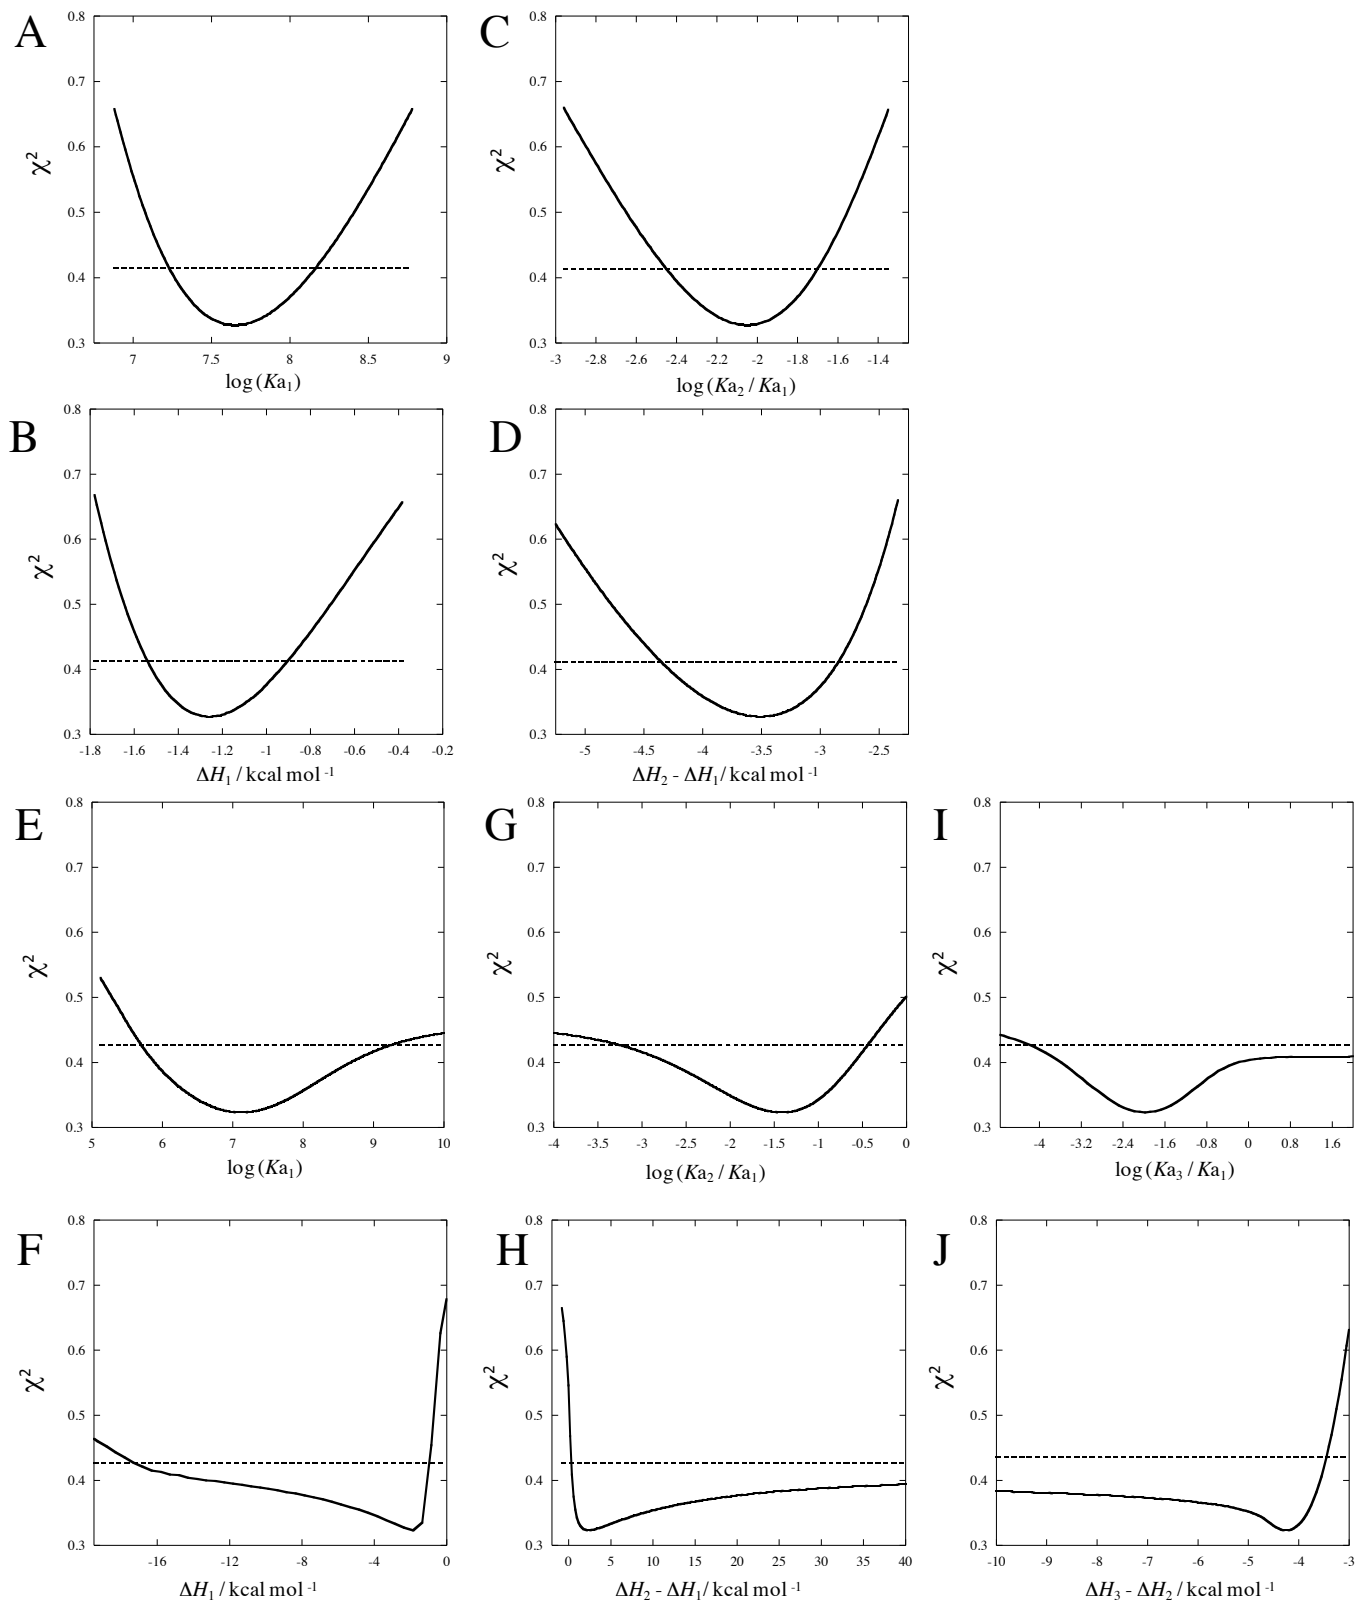

Figure S1. (A) - (D) show the error-surface projections of each fitting parameter for ABB model and (E) - (J) show those for AB BB model. The 68.3% confidence intervals are shown as a dashed line.

Figure S2

a

# hSmc2H-CC30

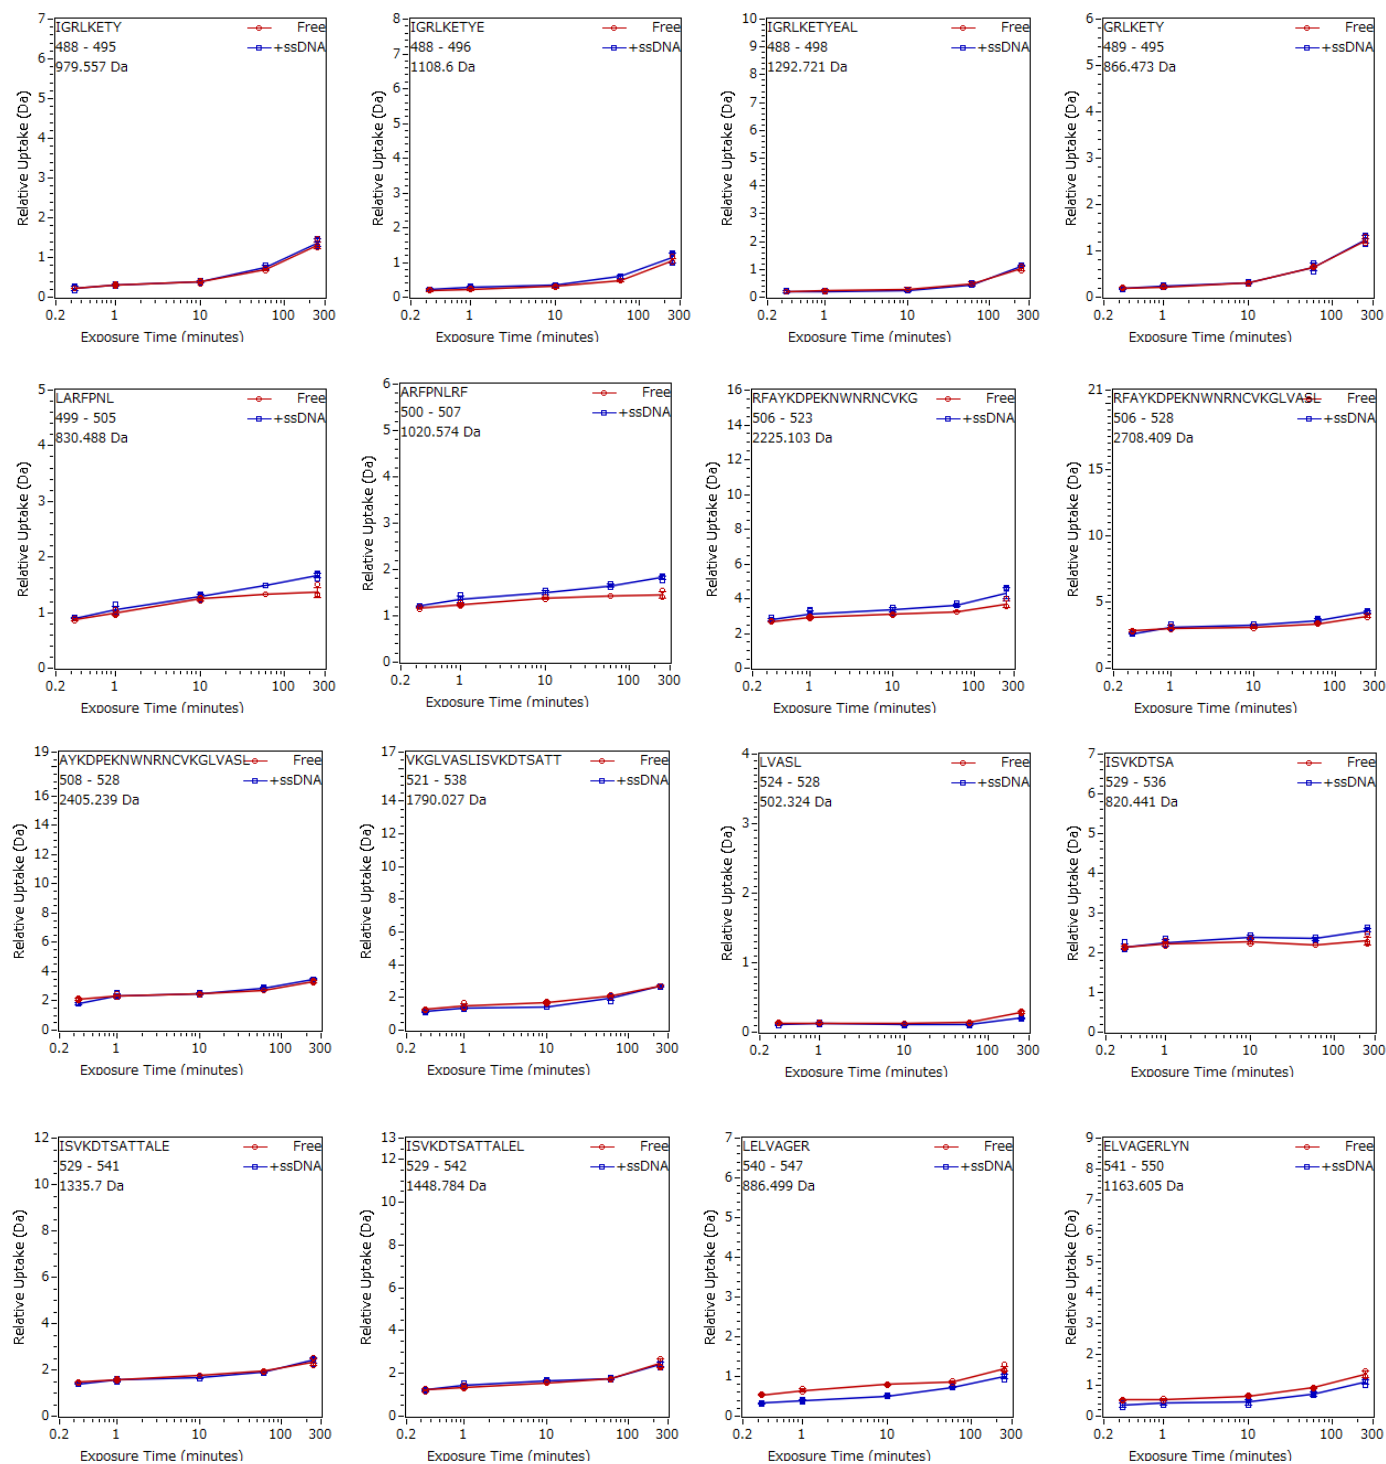

Figure S2. Relative deuterium incorporation curves for all hSmc2H-CC30 pepsin fragments. Both hSmc2H-CC30 alone (red) and hSmc2H-CC30-ssDNA complex (blue) are indicated.

Figure S2

b

hSmc2H-CC30

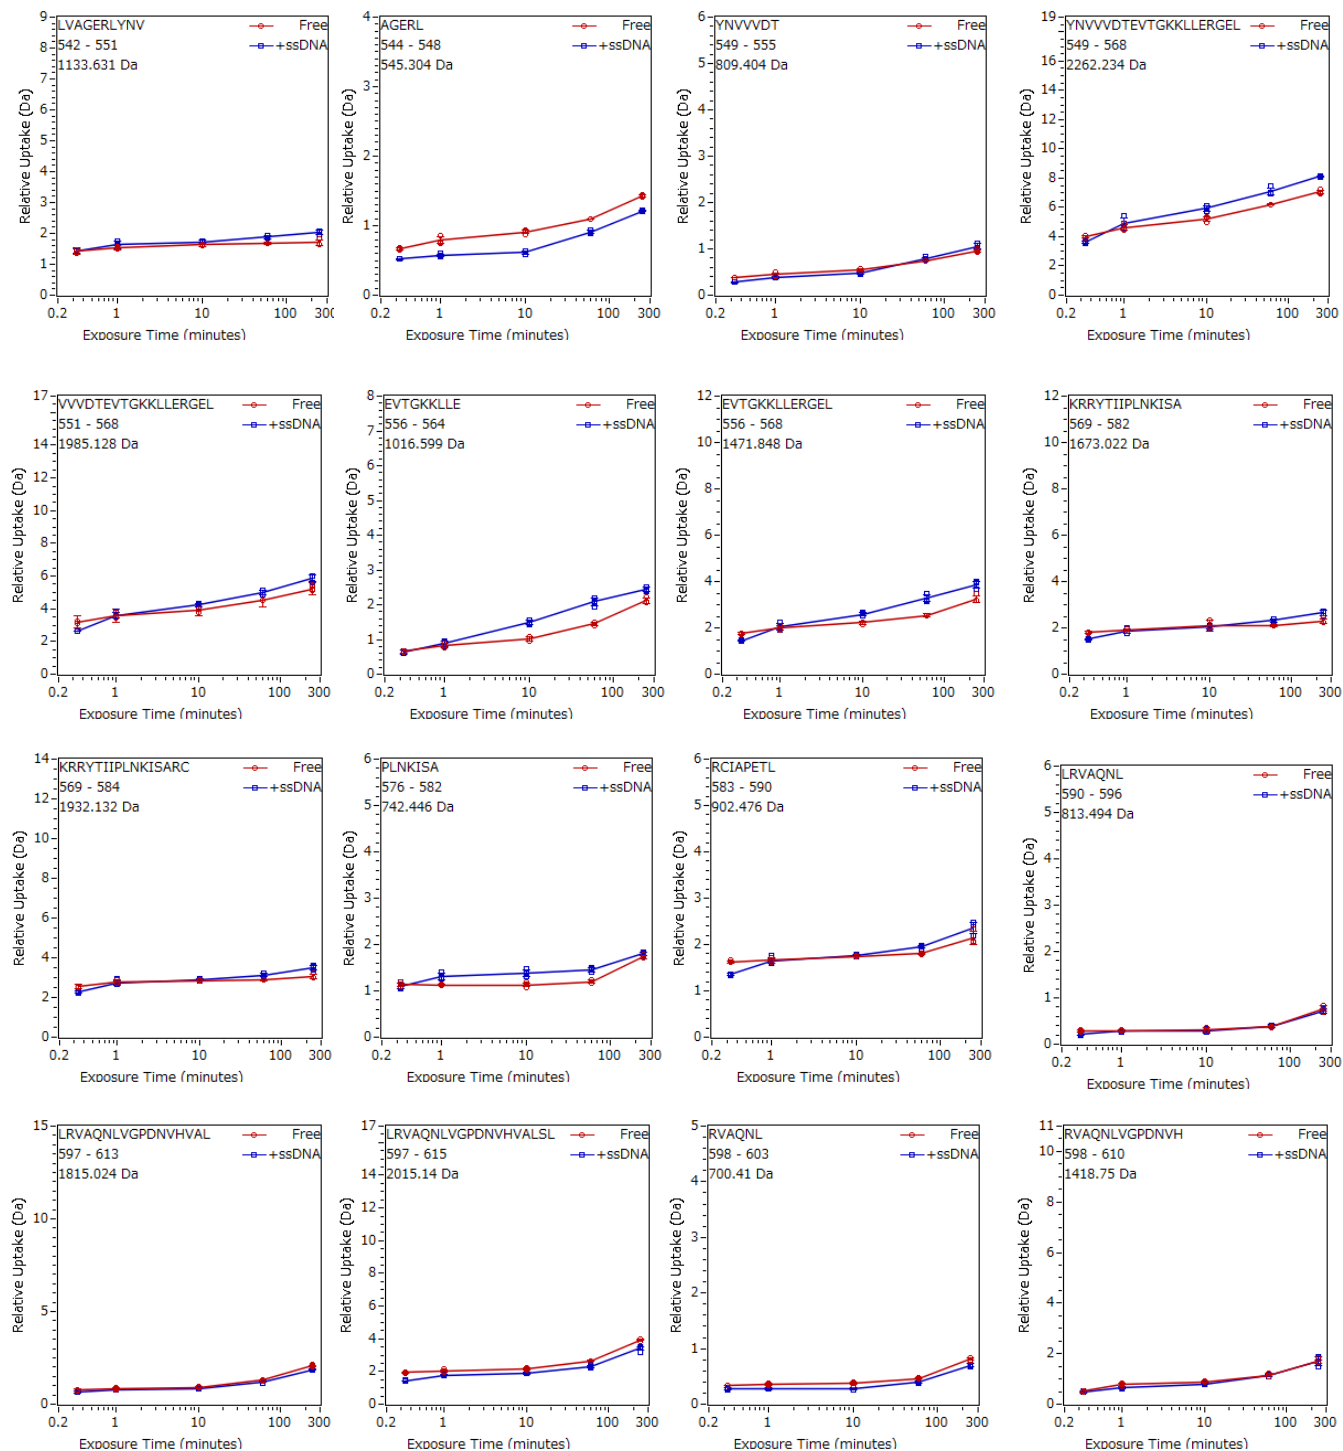

Figure S2

C

hSmc2H-CC30

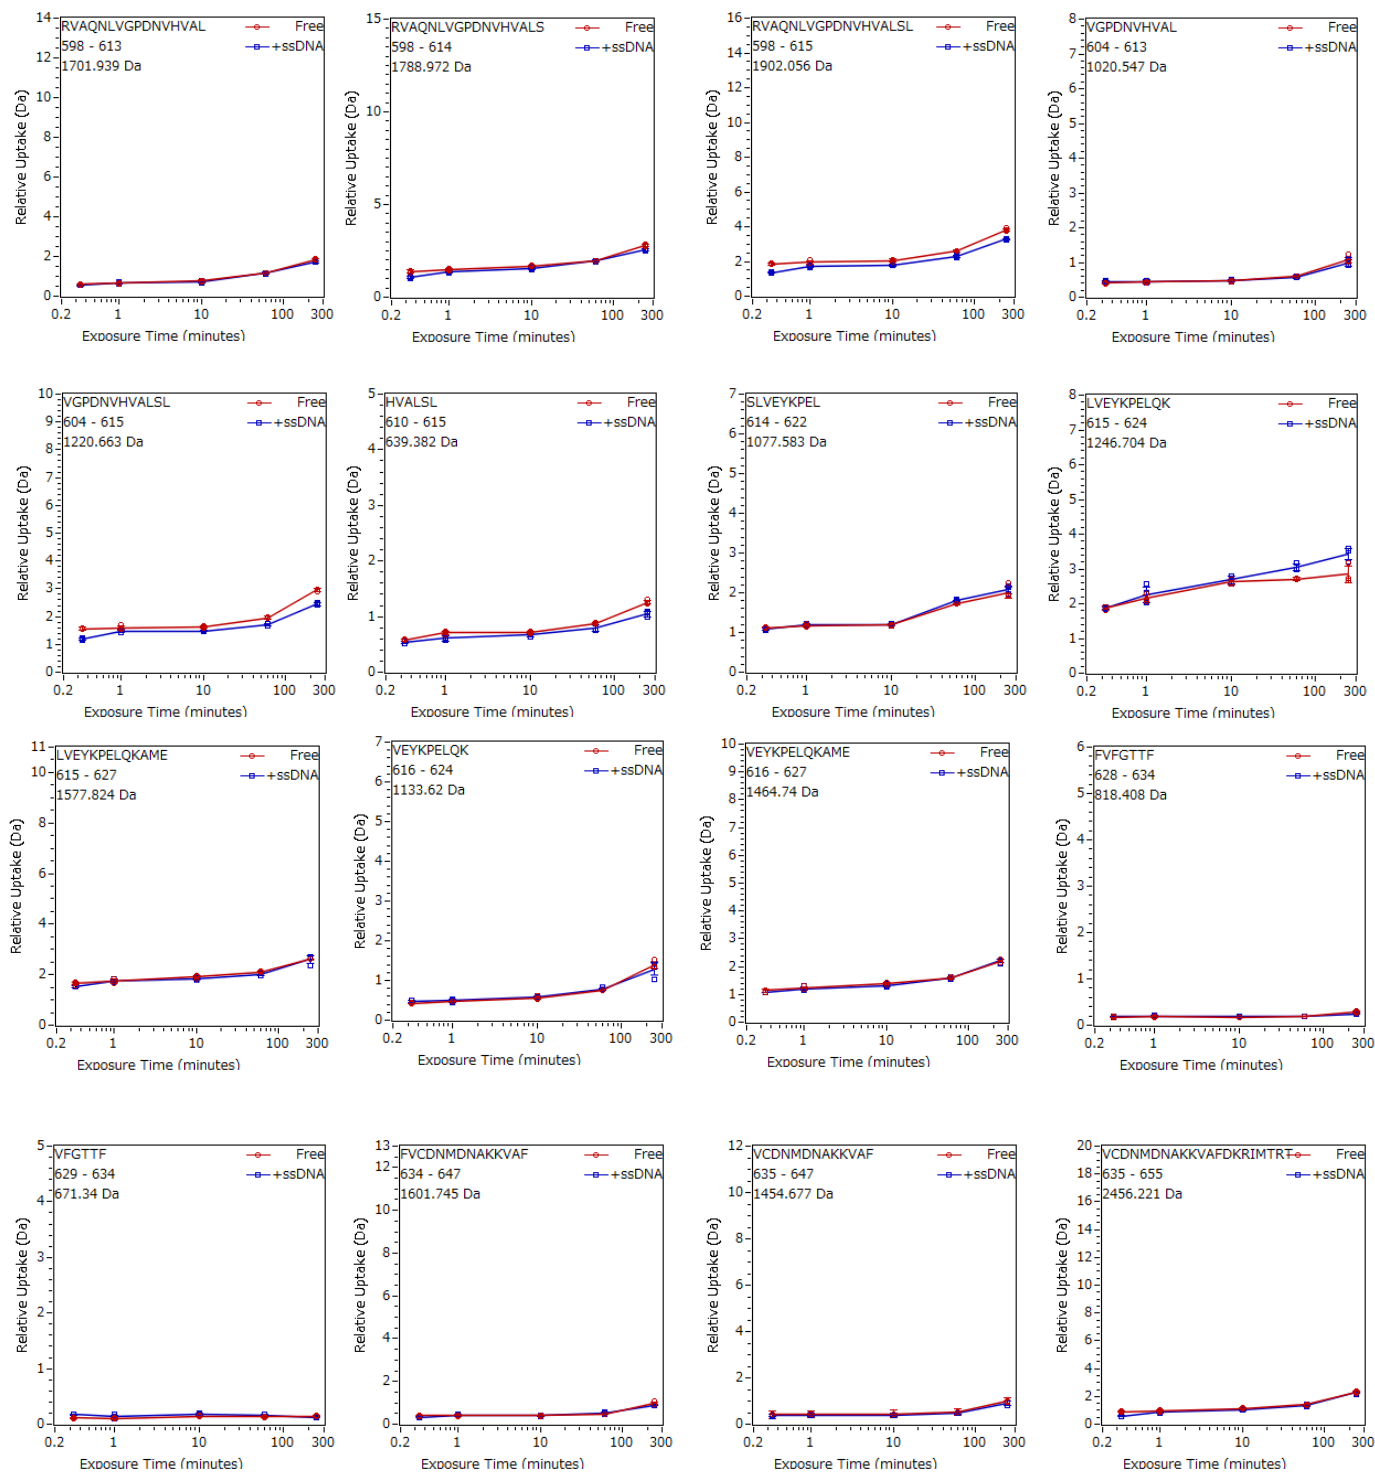

Figure S2

d

# hSmc2H-CC30

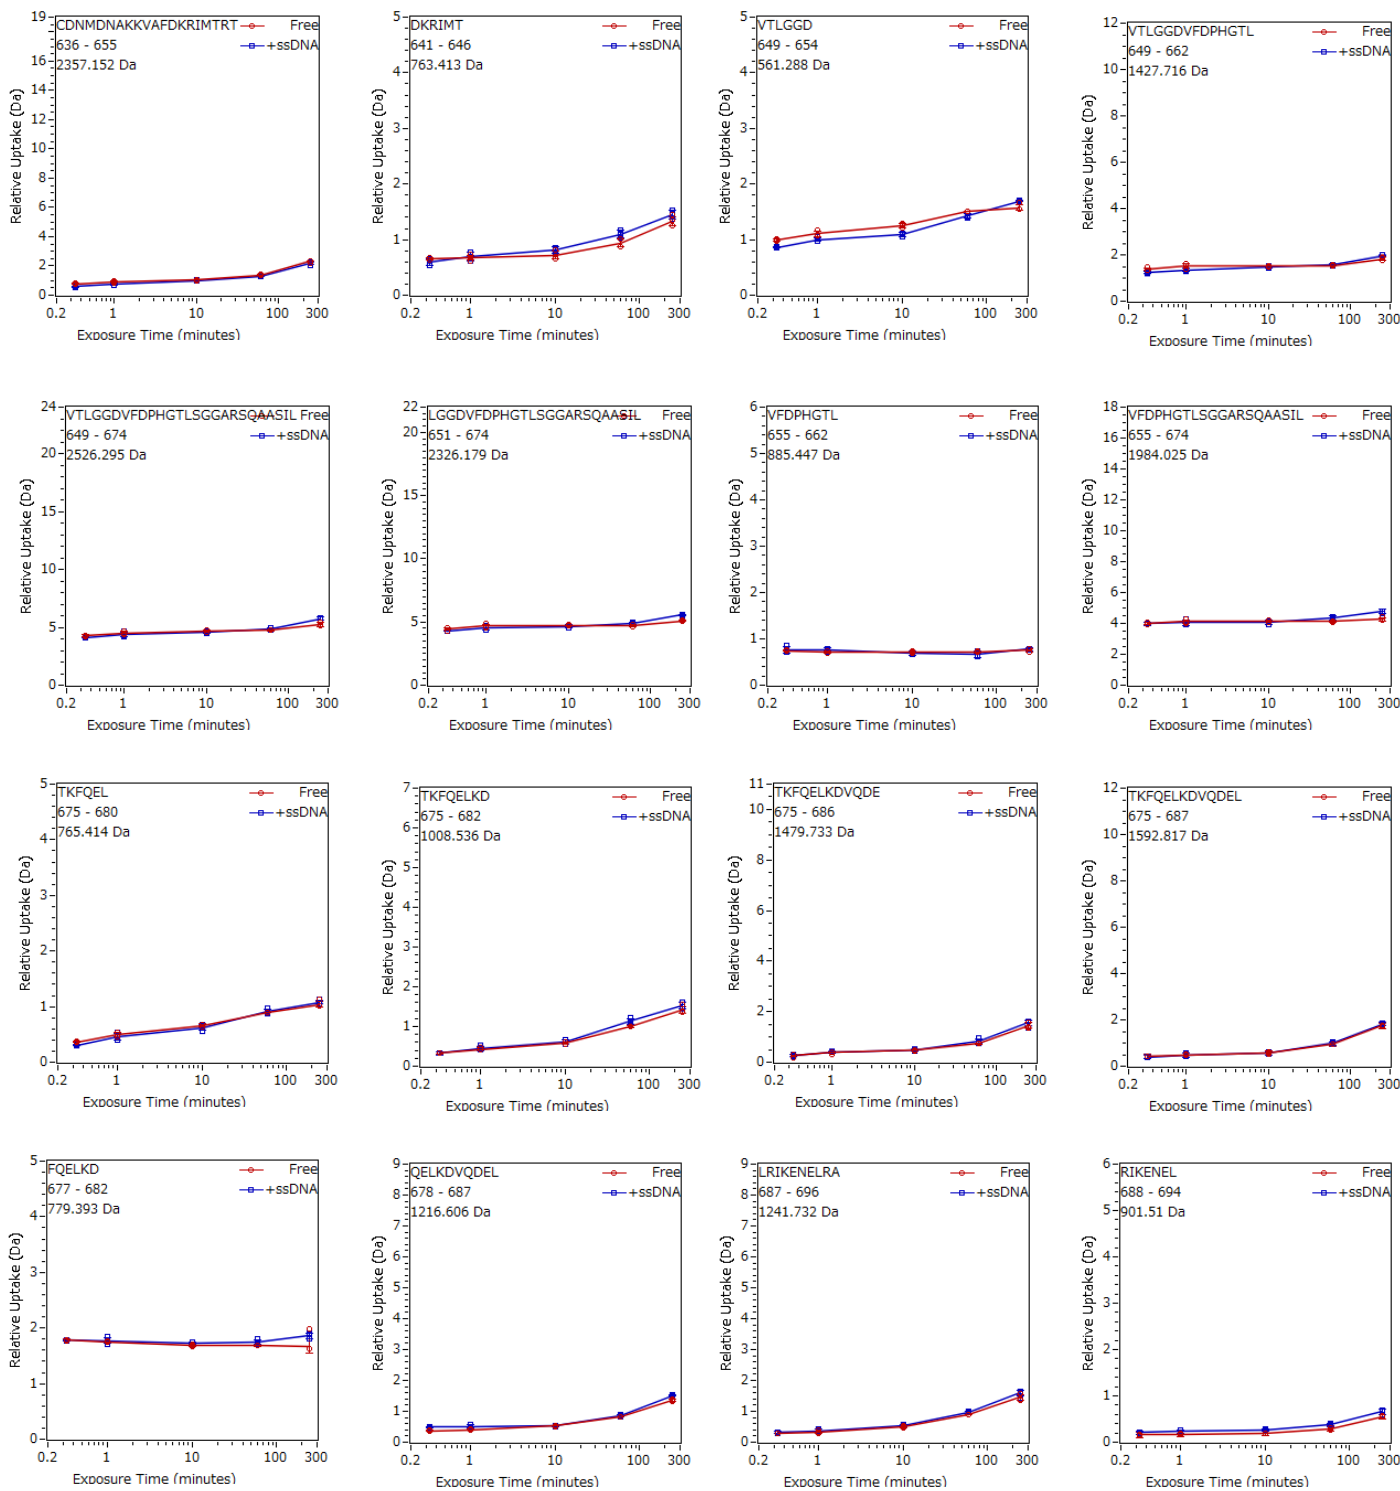

Figure S2

e

### hSmc2H-CC30

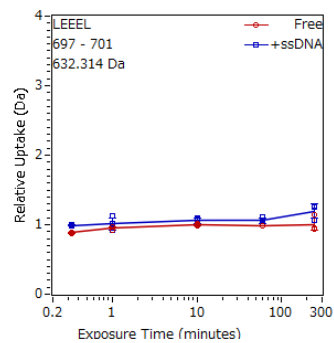

# Figure S3

a

## hSmc4H-CC30

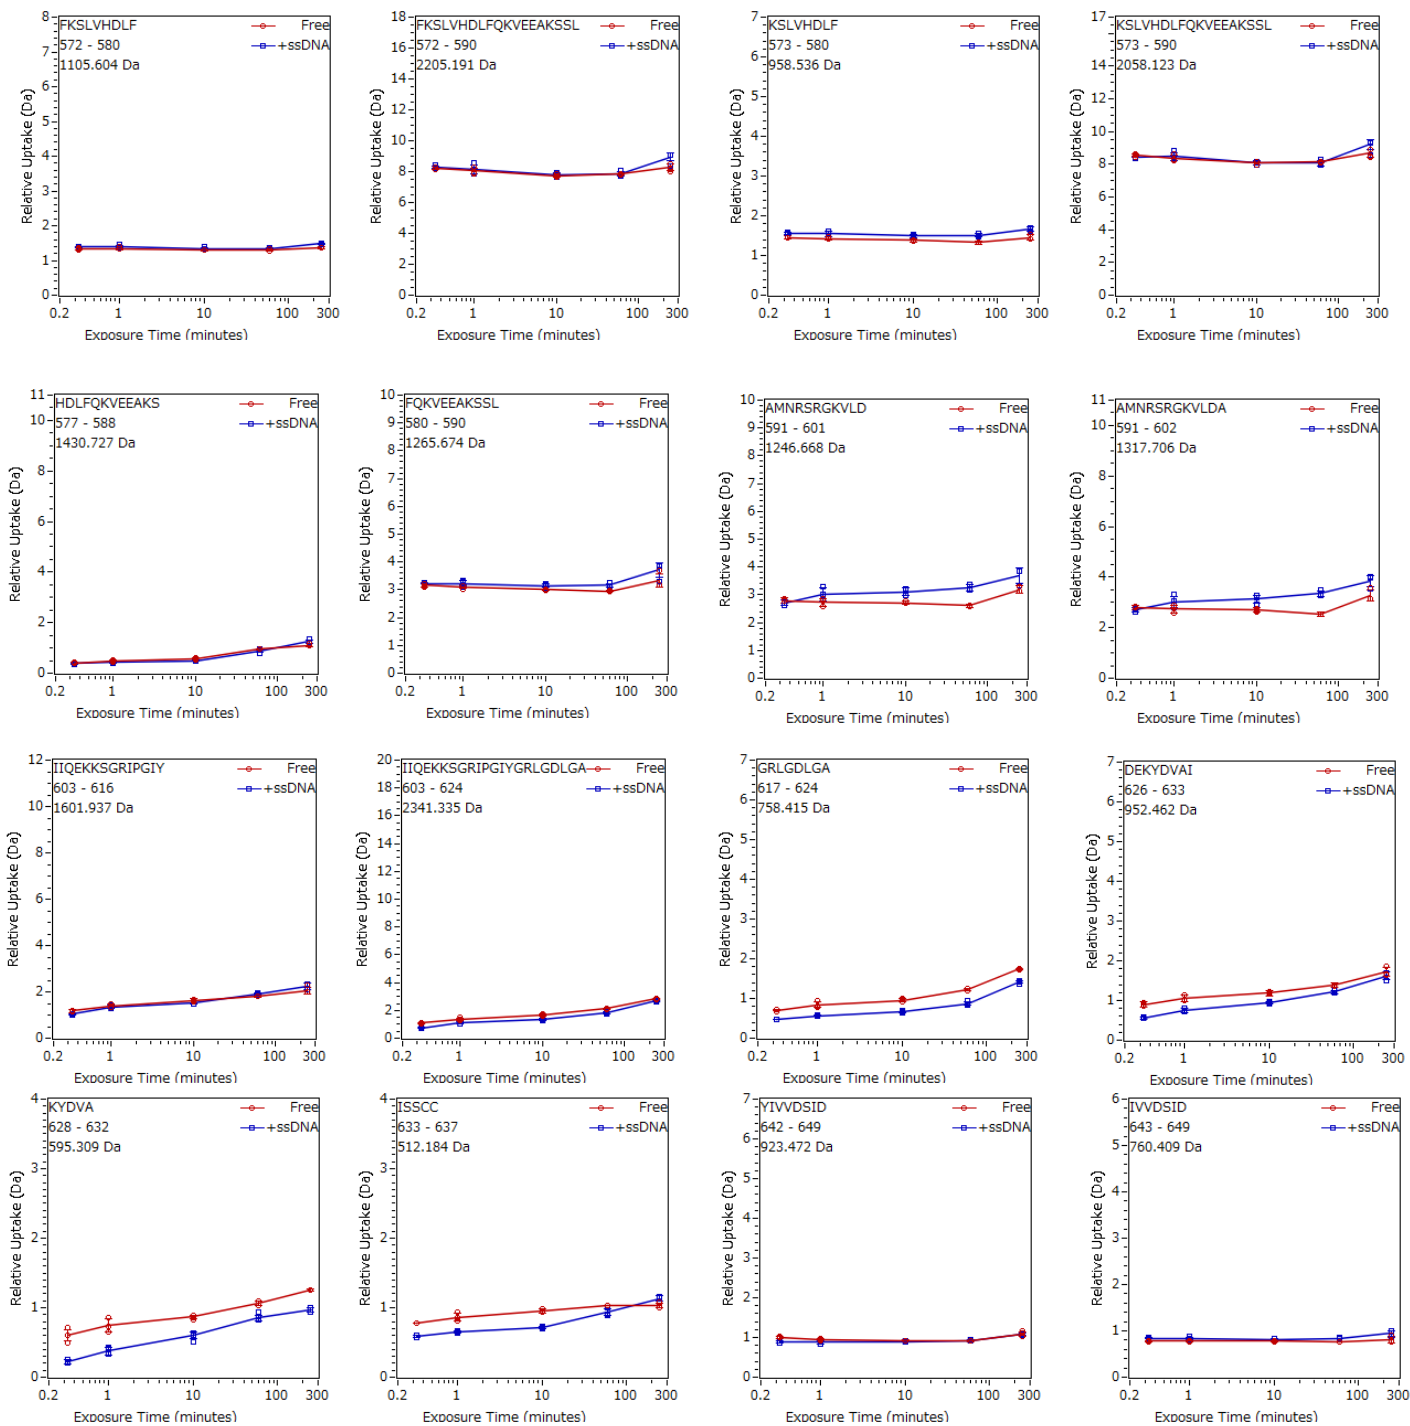

Figure S3. Relative deuterium incorporation curves for all hSmc4H-CC30 pepsin fragments. Both hSmc4H-CC30 alone (red) and hSmc4H-CC30-ssDNA complex (blue) are reported.

Figure S3

b

hSmc4H-CC30

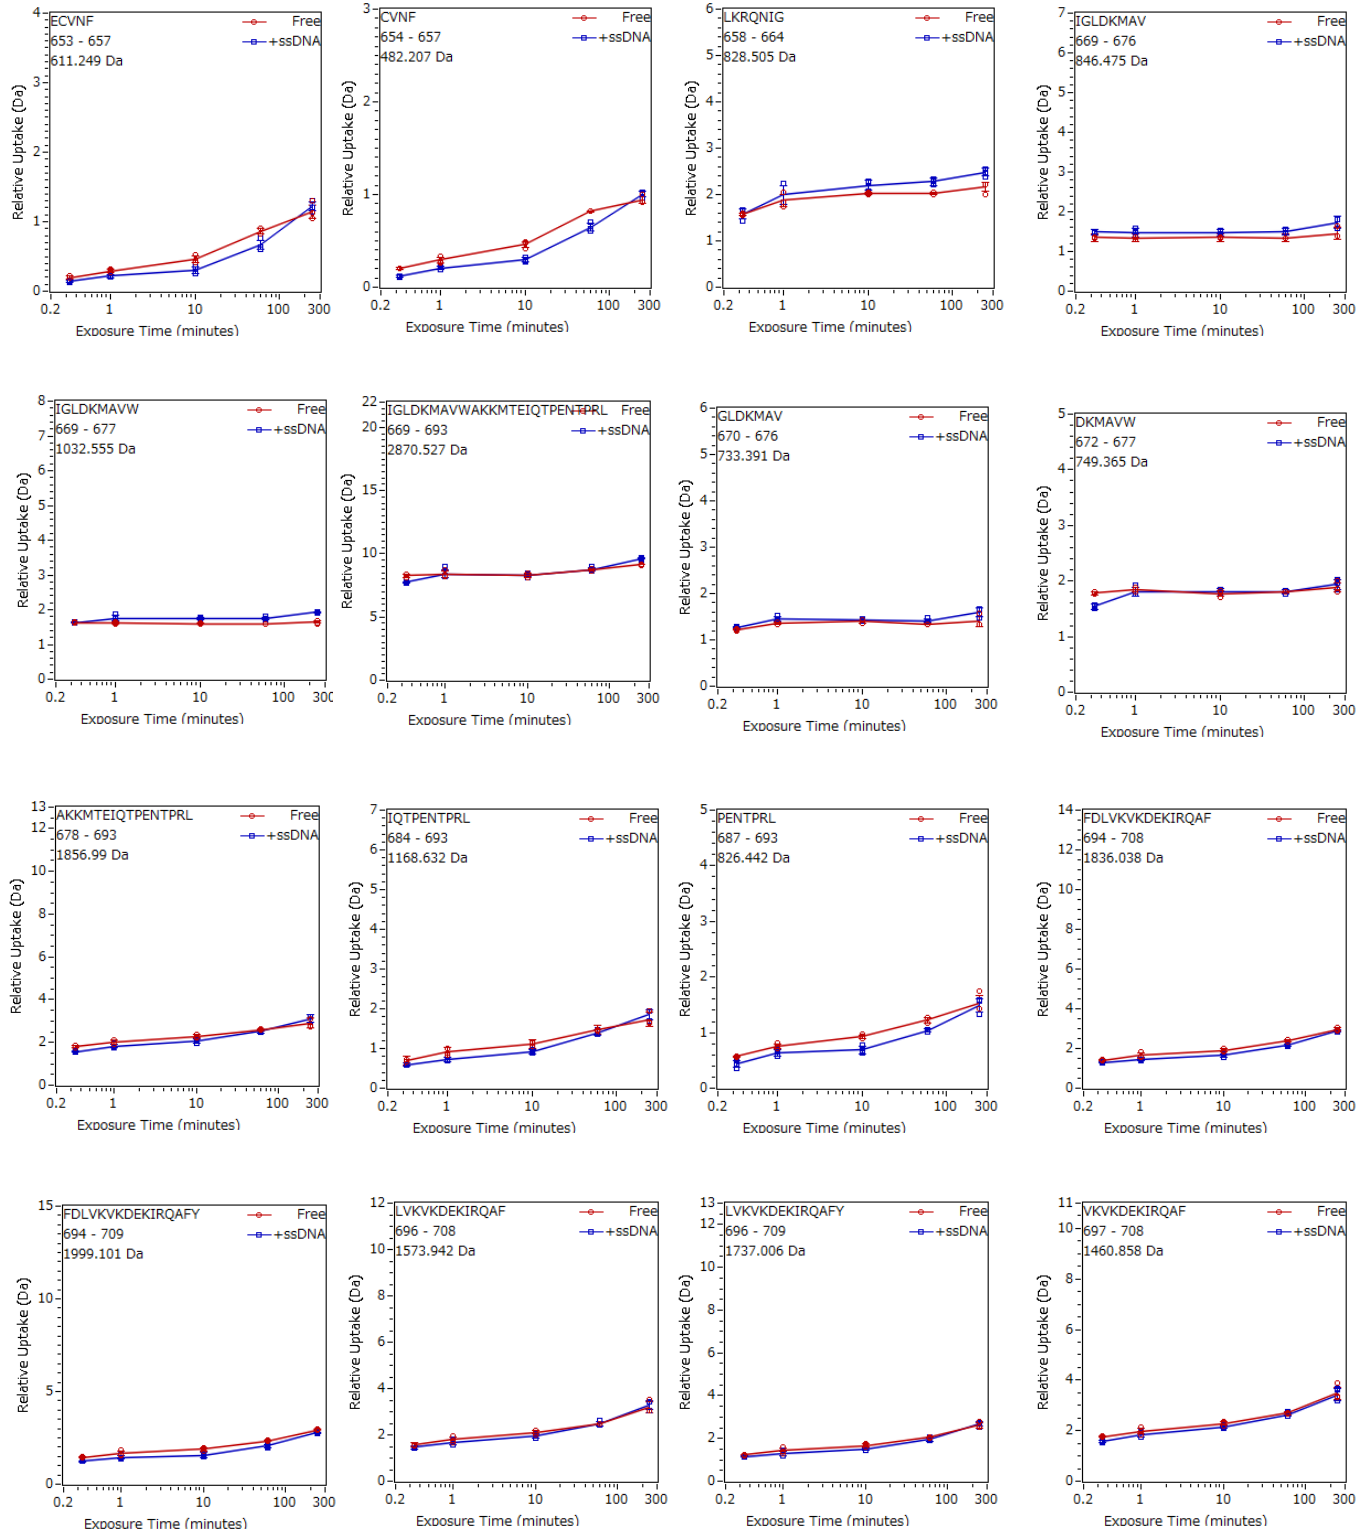



Figure S3

C

hSmc4H-CC30

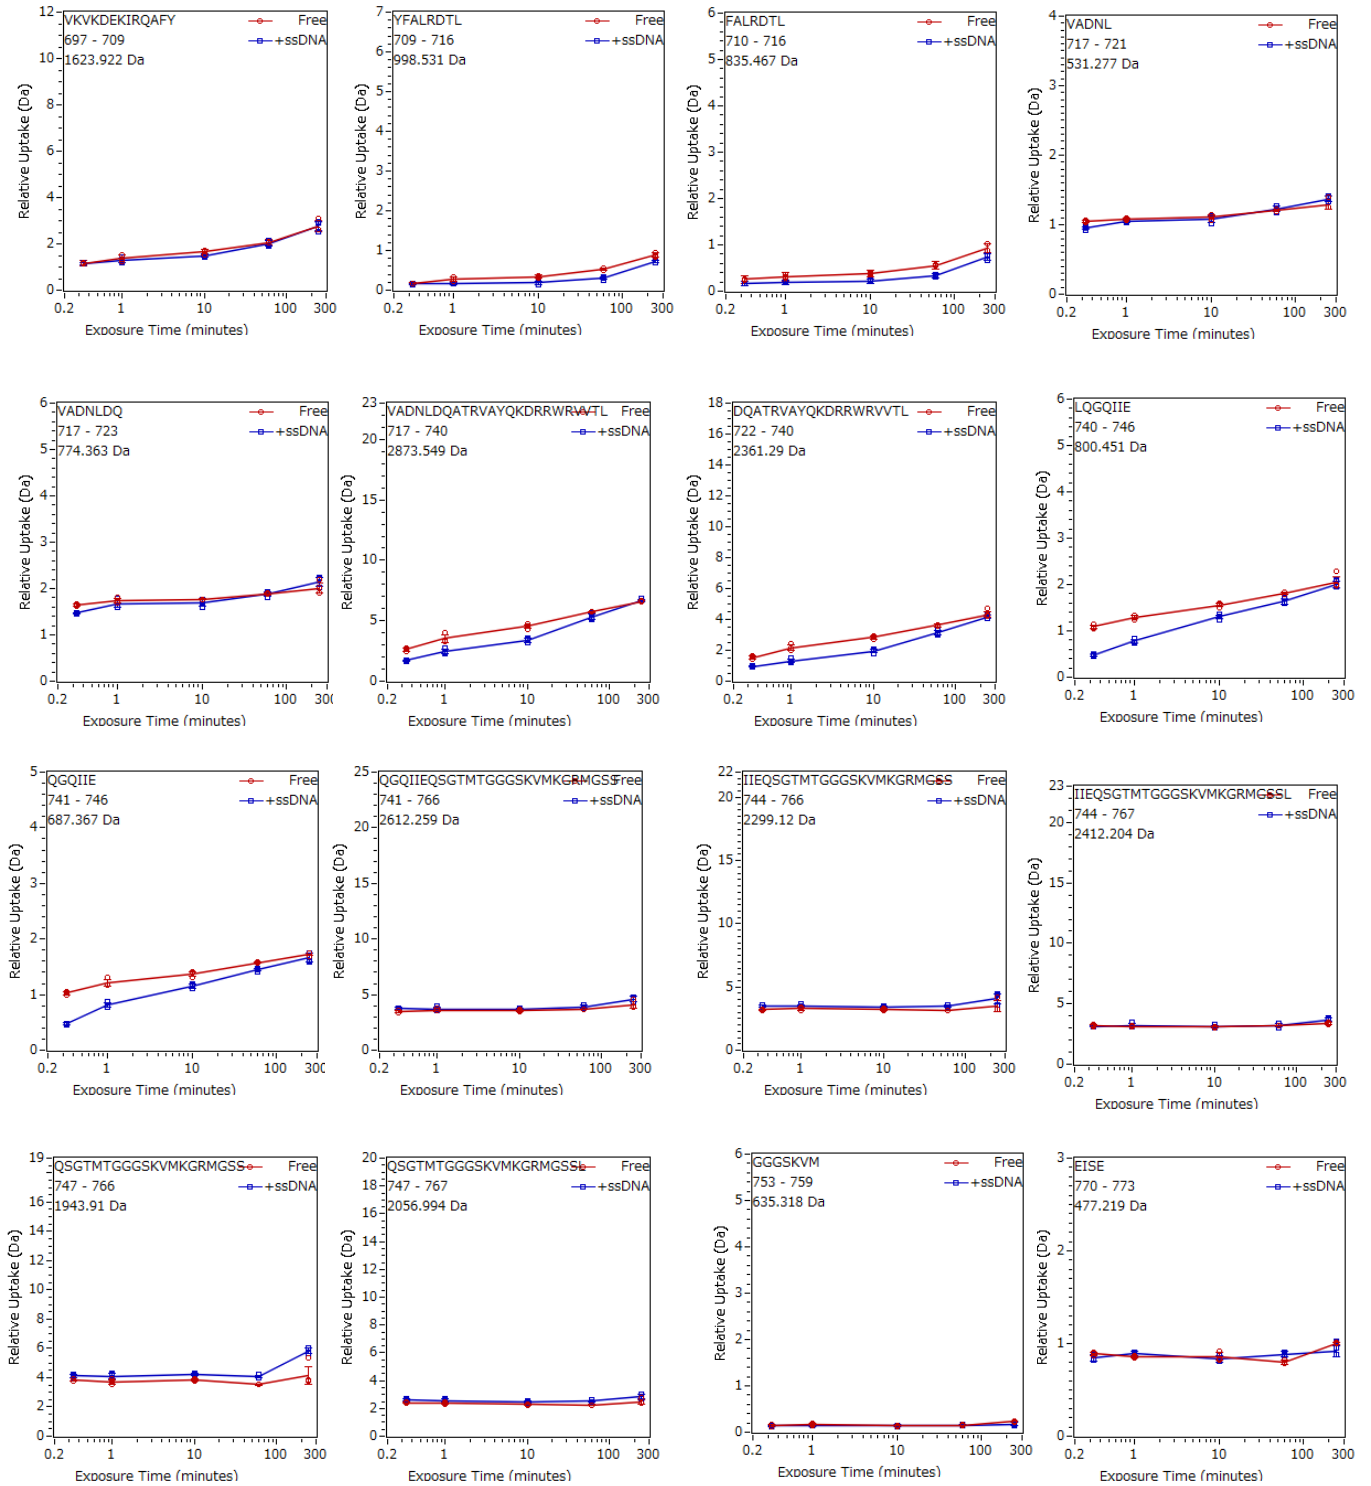

Figure S3

d

hSmc4H-CC30

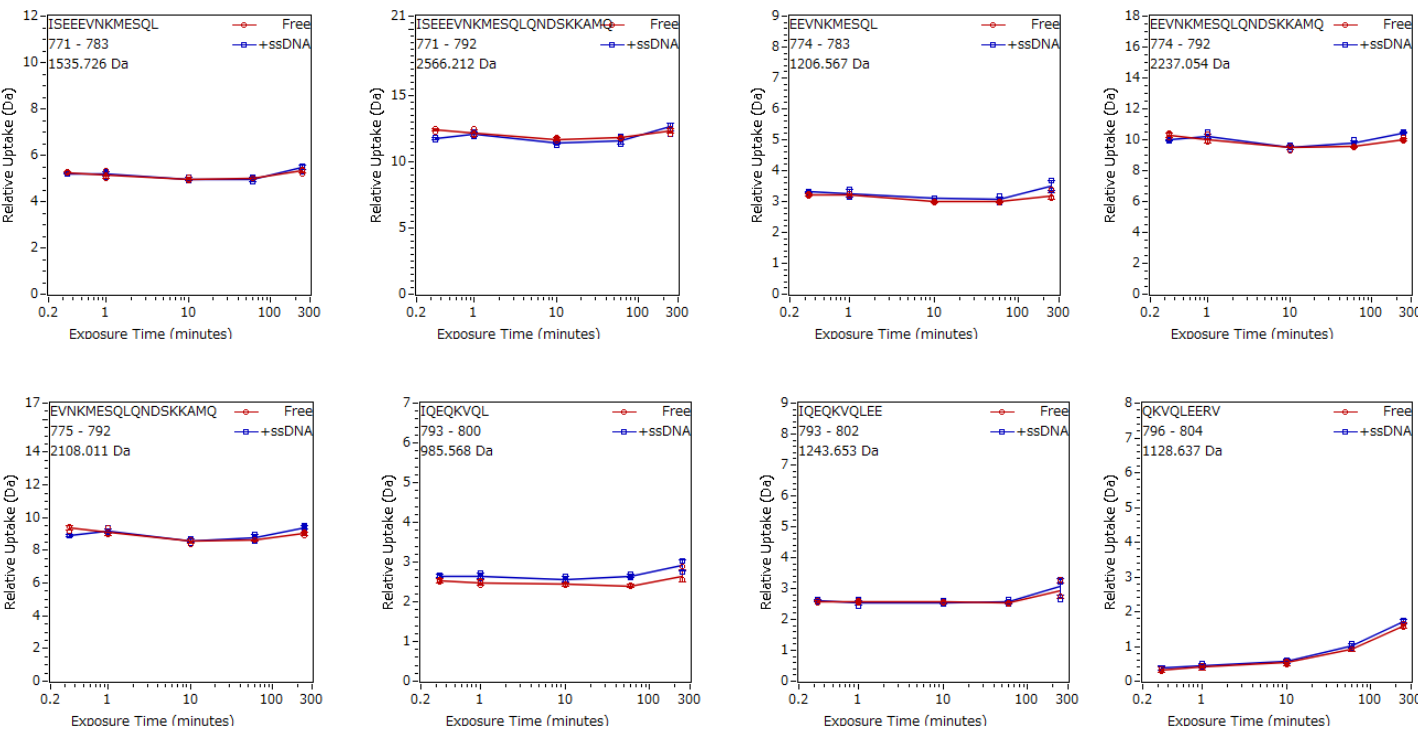

Table S1. The error analysis of the fitting parameters for each binding model

| Model <sup>a</sup> | Fitting Parameter                                  | Best-fit value | 68.3 % error interval |         | RMSD<br>/ cal mol <sup>-1</sup> |
|--------------------|----------------------------------------------------|----------------|-----------------------|---------|---------------------------------|
|                    |                                                    |                | Minimum               | Maximum |                                 |
| ABB                | log ( $K_{a1}$ )                                   | 7.652          | 7.232                 | 8.162   | 200                             |
|                    | $\Delta H_1$ / kcal mol <sup>-1</sup>              | -1.263         | -1.543                | -0.903  |                                 |
|                    | log ( $K_{a2} / K_{a1}$ )                          | -2.050         | -2.450                | -1.700  |                                 |
|                    | $\Delta H_2 - \Delta H_1$ / kcal mol <sup>-1</sup> | -3.514         | -4.354                | -2.844  |                                 |
| ABBB               | log ( $K_{a1}$ )                                   | 7.121          | 5.701                 | 9.231   | 195                             |
|                    | $\Delta H_1$ / kcal mol <sup>-1</sup>              | -1.841         | -17.34                | -0.8412 |                                 |
|                    | log ( $K_{a2} / K_{a1}$ )                          | -1.409         | -3.239                | -0.4391 |                                 |
|                    | $\Delta H_2 - \Delta H_1$ / kcal mol <sup>-1</sup> | 2.364          | -0.164                | -       |                                 |
|                    | log ( $K_{a3} / K_{a1}$ )                          | -1.971         | -4.176                | -       |                                 |
|                    | $\Delta H_3 - \Delta H_2$ / kcal mol <sup>-1</sup> | -4.253         | -                     | -3.453  |                                 |
| ABB <sup>b</sup>   | log ( $K_{a1}$ )                                   | 5.823          | 5.603                 | 6.073   | 260                             |
|                    | $\Delta H_1$ / kcal mol <sup>-1</sup>              | 5.317          | 3.607                 | 7.297   |                                 |
|                    | $\Delta H_2 - \Delta H_1$ / kcal mol <sup>-1</sup> | -15.09         | -19.09                | -11.76  |                                 |
| AB                 | log ( $K_a$ )                                      | 7.252          | 6.252                 | -       | 793                             |
|                    | $\Delta H$ / kcal mol <sup>-1</sup>                | -5.795         | -7.595                | -4.495  |                                 |

<sup>a</sup> A was defined as ssDNA and B was defined as hSmc2H-CC30/hSMC4H-CC30 heterodimer

<sup>b</sup> ABB model, assuming that the value of  $K_{a1}$  is equal to that of  $K_{a2}$

- : not found
